# Supplementary material
Source: MDPI journal article supplement (https://www.mdpi.com/2225-1154/12/5/75)
Supplement: s1 [file s1]

| <u>Attributes</u>         | <u>LR F</u> | <u>SVM RBF F</u> | <u>SVM Poly F</u> | <u>RF F</u> | <u>LR B</u> | <u>SVM RBF B</u> | <u>SVM Poly B</u> | <u>RF B</u> | <u>Mean</u> | <u>Standard Deviation</u> |
|---------------------------|-------------|------------------|-------------------|-------------|-------------|------------------|-------------------|-------------|-------------|---------------------------|
| <u>AMO</u>                | 28.57142857 | 0                | 64.28571429       | 57.14285714 | 42.85714286 | 0                | 92.85714286       | 100         | 48.21428571 | 37.9408009                |
| <u>DMI</u>                | 0           | 85.71428571      | 64.28571429       | 92.85714286 | 50          | 42.85714286      | 71.42857143       | 100         | 63.39285714 | 32.49523401               |
| <u>GlobalSSTA</u>         | 7.142857143 | 57.14285714      | 57.14285714       | 92.85714286 | 28.57142857 | 71.42857143      | 28.57142857       | 100         | 55.35714286 | 32.56525183               |
| <u>GlobalT</u>            | 14.28571429 | 0                | 64.28571429       | 92.85714286 | 50          | 0                | 85.71428571       | 100         | 50.89285714 | 41.5511031                |
| <u>Nino3p4</u>            | 14.28571429 | 92.85714286      | 78.57142857       | 92.85714286 | 64.28571429 | 21.42857143      | 71.42857143       | 100         | 66.96428571 | 32.60719036               |
| <u>PMM</u>                | 35.71428571 | 85.71428571      | 71.42857143       | 100         | 0           | 64.28571429      | 28.57142857       | 100         | 60.71428571 | 36.22089663               |
| <u>SAM</u>                | 7.142857143 | 50               | 64.28571429       | 92.85714286 | 21.42857143 | 14.28571429      | 42.85714286       | 85.71428571 | 47.32142857 | 32.15702636               |
| <u>SOI</u>                | 7.142857143 | 71.42857143      | 85.71428571       | 100         | 42.85714286 | 14.28571429      | 85.71428571       | 100         | 63.39285714 | 37.29902413               |
| <u>TPI</u>                | 21.42857143 | 64.28571429      | 78.57142857       | 50          | 50          | 14.28571429      | 28.57142857       | 64.28571429 | 46.42857143 | 22.90810645               |
| <u>TSSST</u>              | 7.142857143 | 14.28571429      | 50                | 71.42857143 | 35.71428571 | 0                | 14.28571429       | 92.85714286 | 35.71428571 | 33.284707                 |
| <u>AMO*DMI</u>            | 35.71428571 | 64.28571429      | 71.42857143       | 71.42857143 | 21.42857143 | 64.28571429      | 100               | 100         | 66.07142857 | 27.46585476               |
| <u>AMO*GlobalSSTA</u>     | 14.28571429 | 0                | 64.28571429       | 28.57142857 | 21.42857143 | 0                | 71.42857143       | 57.14285714 | 32.14285714 | 28.57142857               |
| <u>AMO*GlobalT</u>        | 21.42857143 | 0                | 57.14285714       | 42.85714286 | 35.71428571 | 0                | 92.85714286       | 92.85714286 | 42.85714286 | 36.62113968               |
| <u>AMO*Nino3p4</u>        | 50          | 64.28571429      | 64.28571429       | 14.28571429 | 71.42857143 | 0                | 50                | 35.71428571 | 43.75       | 25.45146298               |
| <u>AMO*PMM</u>            | 35.71428571 | 78.57142857      | 71.42857143       | 71.42857143 | 42.85714286 | 92.85714286      | 78.57142857       | 100         | 71.42857143 | 22.26267778               |
| <u>AMO*SAM</u>            | 0           | 78.57142857      | 71.42857143       | 100         | 0           | 64.28571429      | 71.42857143       | 92.85714286 | 59.82142857 | 38.73689                  |
| <u>AMO*SOI</u>            | 14.28571429 | 14.28571429      | 64.28571429       | 35.71428571 | 28.57142857 | 0                | 35.71428571       | 64.28571429 | 32.14285714 | 23.22409526               |
| <u>AMO*TPI</u>            | 35.71428571 | 71.42857143      | 71.42857143       | 28.57142857 | 35.71428571 | 0                | 71.42857143       | 42.85714286 | 44.64285714 | 25.54079798               |
| <u>AMO*TSSST</u>          | 28.57142857 | 64.28571429      | 57.14285714       | 78.57142857 | 35.71428571 | 78.57142857      | 85.71428571       | 100         | 66.07142857 | 24.66983144               |
| <u>DMI*GlobalSSTA</u>     | 42.85714286 | 7.142857143      | 57.14285714       | 92.85714286 | 14.28571429 | 0                | 14.28571429       | 100         | 41.07142857 | 39.07643702               |
| <u>DMI*GlobalT</u>        | 21.42857143 | 14.28571429      | 50                | 100         | 21.42857143 | 7.142857143      | 28.57142857       | 100         | 42.85714286 | 37.40878118               |
| <u>DMI*Nino3p4</u>        | 0           | 35.71428571      | 64.28571429       | 100         | 42.85714286 | 0                | 42.85714286       | 100         | 48.21428571 | 38.70159443               |
| <u>DMI*PMM</u>            | 7.142857143 | 71.42857143      | 57.14285714       | 85.71428571 | 28.57142857 | 35.71428571      | 28.57142857       | 92.85714286 | 50.89285714 | 30.64836305               |
| <u>DMI*SAM</u>            | 7.142857143 | 64.28571429      | 64.28571429       | 78.57142857 | 21.42857143 | 42.85714286      | 64.28571429       | 92.85714286 | 54.46428571 | 28.80959409               |
| <u>DMI*SOI</u>            | 28.57142857 | 50               | 57.14285714       | 100         | 7.142857143 | 0                | 35.71428571       | 100         | 47.32142857 | 37.78439294               |
| <u>DMI*TPI</u>            | 7.142857143 | 71.42857143      | 64.28571429       | 100         | 21.42857143 | 7.142857143      | 50                | 92.85714286 | 51.78571429 | 36.77010765               |
| <u>DMI*TSSST</u>          | 7.142857143 | 42.85714286      | 42.85714286       | 78.57142857 | 28.57142857 | 21.42857143      | 42.85714286       | 78.57142857 | 42.85714286 | 25.32586458               |
| <u>GlobalSSTA*GlobalT</u> | 7.142857143 | 0                | 21.42857143       | 85.71428571 | 7.142857143 | 0                | 35.71428571       | 100         | 32.14285714 | 39.49388261               |
| <u>GlobalSSTA*Nino3p4</u> | 0           | 64.28571429      | 42.85714286       | 100         | 14.28571429 | 14.28571429      | 42.85714286       | 100         | 47.32142857 | 38.35872949               |
| <u>GlobalSSTA*PMM</u>     | 21.42857143 | 35.71428571      | 50                | 85.71428571 | 0           | 7.142857143      | 78.57142857       | 92.85714286 | 46.42857143 | 36.22089663               |
| <u>GlobalSSTA*SAM</u>     | 7.142857143 | 42.85714286      | 57.14285714       | 100         | 7.142857143 | 0                | 92.85714286       | 92.85714286 | 50          | 42.17138433               |

|                           |             |             |             |             |             |             |             |             |             |             |
|---------------------------|-------------|-------------|-------------|-------------|-------------|-------------|-------------|-------------|-------------|-------------|
| <u>GlobalSSTA*SOI</u>     | 7.142857143 | 71.42857143 | 71.42857143 | 92.85714286 | 7.142857143 | 71.42857143 | 78.57142857 | 92.85714286 | 61.60714286 | 34.77069826 |
| <u>GlobalSSTA*TPI</u>     | 21.42857143 | 57.14285714 | 57.14285714 | 92.85714286 | 0           | 0           | 28.57142857 | 100         | 44.64285714 | 38.70159443 |
| <u>GlobalSSTA*TSSS</u>    | 7.142857143 | 0           | 28.57142857 | 92.85714286 | 0           | 0           | 28.57142857 | 100         | 32.14285714 | 41.47428864 |
| <u>GlobalT*Nino3p4</u>    | 14.28571429 | 64.28571429 | 42.85714286 | 100         | 0           | 14.28571429 | 42.85714286 | 100         | 47.32142857 | 38.35872949 |
| <u>GlobalT*PMM</u>        | 7.142857143 | 35.71428571 | 57.14285714 | 92.85714286 | 0           | 28.57142857 | 35.71428571 | 85.71428571 | 42.85714286 | 33.71981968 |
| <u>GlobalT*SAM</u>        | 7.142857143 | 7.142857143 | 50          | 100         | 0           | 0           | 85.71428571 | 100         | 43.75       | 45.72664055 |
| <u>GlobalT*SOI</u>        | 0           | 64.28571429 | 57.14285714 | 78.57142857 | 0           | 42.85714286 | 78.57142857 | 92.85714286 | 51.78571429 | 35.35533906 |
| <u>GlobalT*TPI</u>        | 7.142857143 | 42.85714286 | 42.85714286 | 85.71428571 | 0           | 14.28571429 | 50          | 85.71428571 | 41.07142857 | 33.00984922 |
| <u>GlobalT*TSSST</u>      | 21.42857143 | 0           | 28.57142857 | 92.85714286 | 0           | 0           | 28.57142857 | 100         | 33.92857143 | 40.54116434 |
| <u>Nino3p4*PMM</u>        | 42.85714286 | 85.71428571 | 50          | 85.71428571 | 0           | 50          | 50          | 92.85714286 | 57.14285714 | 30.54414193 |
| <u>Nino3p4*SAM</u>        | 0           | 78.57142857 | 71.42857143 | 92.85714286 | 0           | 35.71428571 | 71.42857143 | 92.85714286 | 55.35714286 | 38.51280503 |
| <u>Nino3p4*SOI</u>        | 14.28571429 | 42.85714286 | 71.42857143 | 100         | 0           | 21.42857143 | 7.142857143 | 100         | 44.64285714 | 40.89915066 |
| <u>Nino3p4*TPI</u>        | 0           | 78.57142857 | 64.28571429 | 78.57142857 | 0           | 71.42857143 | 42.85714286 | 100         | 54.46428571 | 37.20119046 |
| <u>Nino3p4*TSSST</u>      | 28.57142857 | 35.71428571 | 57.14285714 | 100         | 0           | 0           | 50          | 100         | 46.42857143 | 38.93629394 |
| <u>PMM*SAM</u>            | 0           | 78.57142857 | 64.28571429 | 71.42857143 | 0           | 64.28571429 | 42.85714286 | 92.85714286 | 51.78571429 | 34.94059932 |
| <u>PMM*SOI</u>            | 28.57142857 | 78.57142857 | 50          | 100         | 0           | 35.71428571 | 57.14285714 | 100         | 56.25       | 35.29085726 |
| <u>PMM*TPI</u>            | 57.14285714 | 85.71428571 | 50          | 100         | 0           | 64.28571429 | 92.85714286 | 92.85714286 | 67.85714286 | 33.06500356 |
| <u>PMM*TSSST</u>          | 0           | 64.28571429 | 42.85714286 | 85.71428571 | 0           | 21.42857143 | 50          | 92.85714286 | 44.64285714 | 35.76526973 |
| <u>SAM*SOI</u>            | 7.142857143 | 71.42857143 | 64.28571429 | 92.85714286 | 0           | 42.85714286 | 71.42857143 | 100         | 56.25       | 36.9061334  |
| <u>SAM*TPI</u>            | 14.28571429 | 71.42857143 | 64.28571429 | 92.85714286 | 0           | 57.14285714 | 28.57142857 | 100         | 53.57142857 | 36.22089663 |
| <u>SAM*TSSST</u>          | 0           | 71.42857143 | 42.85714286 | 85.71428571 | 0           | 7.142857143 | 28.57142857 | 92.85714286 | 41.07142857 | 38.32308563 |
| <u>SOI*TPI</u>            | 0           | 50          | 64.28571429 | 92.85714286 | 0           | 14.28571429 | 21.42857143 | 92.85714286 | 41.96428571 | 38.64269682 |
| <u>SOI*TSSST</u>          | 21.42857143 | 28.57142857 | 78.57142857 | 100         | 0           | 14.28571429 | 64.28571429 | 100         | 50.89285714 | 39.75828938 |
| <u>TPI*TSSST</u>          | 57.14285714 | 78.57142857 | 71.42857143 | 92.85714286 | 0           | 57.14285714 | 50          | 100         | 63.39285714 | 31.12035791 |
| <u>Mean</u>               | 16.36363636 | 50.90909091 | 58.96103896 | 84.02597403 | 16.36363636 | 25.58441558 | 53.63636364 | 92.33766234 |             |             |
| <u>Standard Deviation</u> | 15.28716846 | 28.77094838 | 12.98424694 | 20.66376051 | 19.76203515 | 27.03161936 | 24.39257254 | 13.94125358 |             |             |
